# Supplementary material for: Motor neuron preservation and decrease of in vivo TDP-43 phosphorylation by protein CK-1δ kinase inhibitor treatment
Source: PubMed Central journal article supplement (PMC7064575; doi:10.1038/s41598-020-61265-y), 2020-03-10

## Motor neuron preservation and decrease of *in vivo* TDP-43 phosphorylation by protein CK-1δ kinase inhibitor treatment

Loreto Martinez-Gonzalez,<sup>1</sup> Carmen Rodríguez-Cueto,<sup>2-4</sup> Diego Cabezudo,<sup>2</sup> Fernando Bartolome,<sup>4,5</sup> Pol Andrés-Benito,<sup>4,6,7</sup> Isidro Ferrer,<sup>4,6,7</sup> Carmen Gil,<sup>1,4</sup> Ángeles Martín-Requero,<sup>1,4</sup> Javier Fernández-Ruiz,<sup>2-4</sup> Ana Martínez,<sup>1,4</sup> \* and Eva de Lago<sup>2-4</sup>.\*

<sup>1</sup>Centro de Investigaciones Biológicas-CSIC, Ramiro de Maeztu 9, 28040 Madrid, (Spain).

<sup>2</sup>Instituto Universitario de Investigación en Neuroquímica, Departamento de Bioquímica y Biología Molecular, Facultad de Medicina, Universidad Complutense, Madrid (Spain).

<sup>3</sup>Instituto Ramón y Cajal de Investigación Sanitaria (IRYCIS), Madrid (Spain).

<sup>4</sup>Centro de Investigación Biomédica en Red de Enfermedades Neurodegenerativas (CIBERNED), Madrid (Spain).

<sup>5</sup>Instituto de Investigación Sanitaria Hospital 12 de Octubre (imas12), 28041, Madrid (Spain)

<sup>6</sup>Department of Pathology and Experimental Therapeutics, University of Barcelona, Hospitalet de Llobregat, (Spain)

<sup>7</sup>Bellvitge University Hospital, IDIBELL (Bellvitge Biomedical Research Centre), Hospitalet de Llobregat, (Spain).

\* [ana.martinez@csic.es](mailto:ana.martinez@csic.es)

\* [elagofem@ucm.es](mailto:elagofem@ucm.es)

Supplemental figure 1

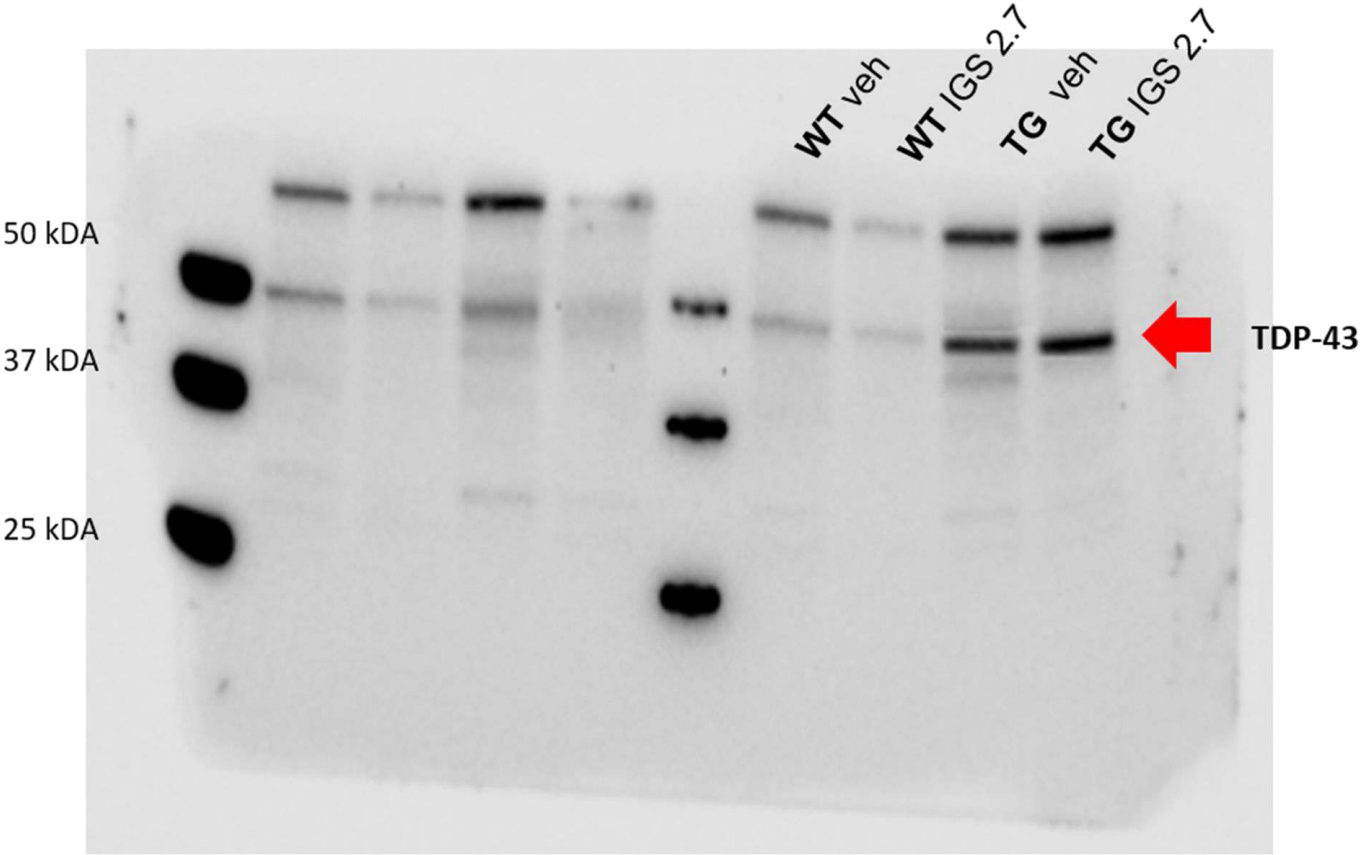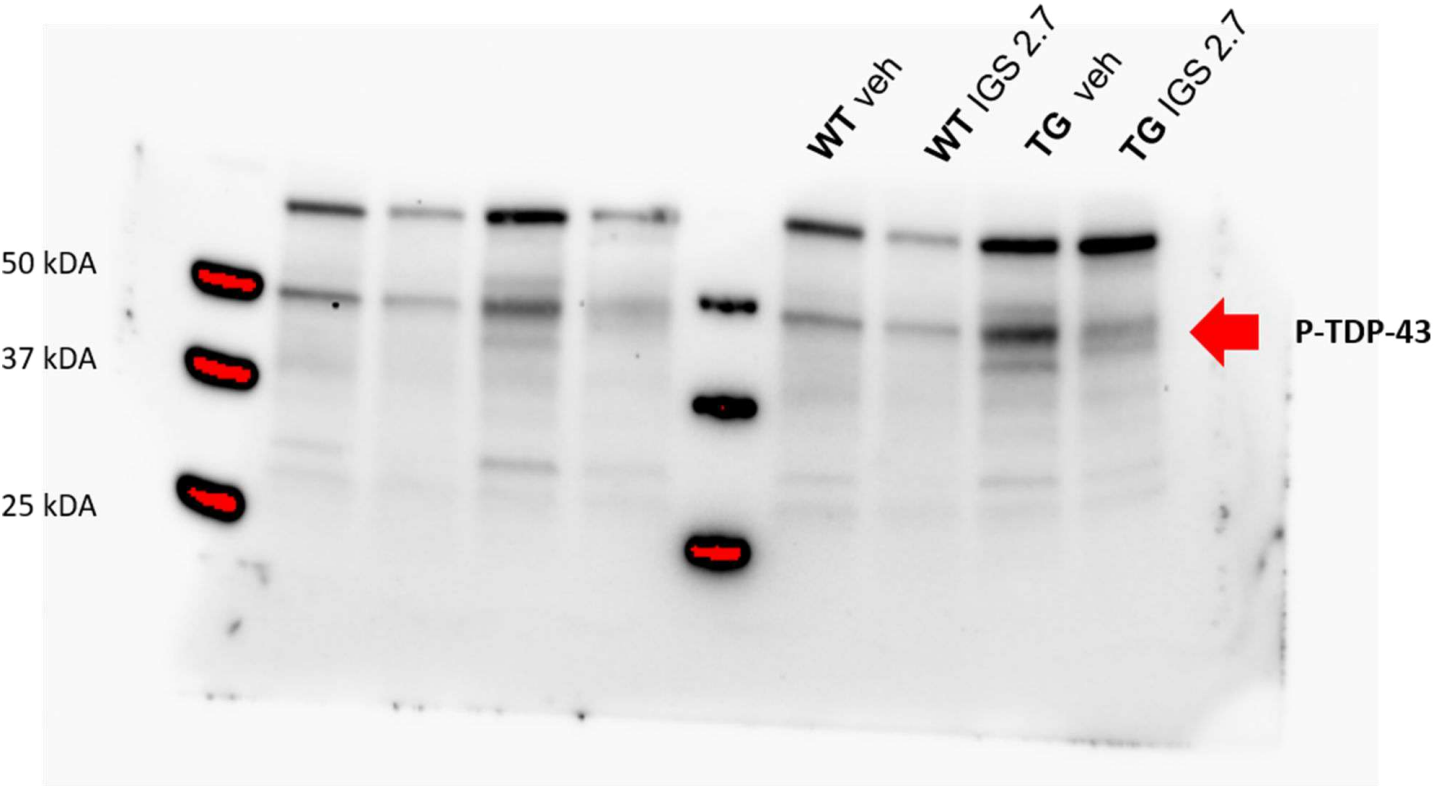

Supplemental figure 2

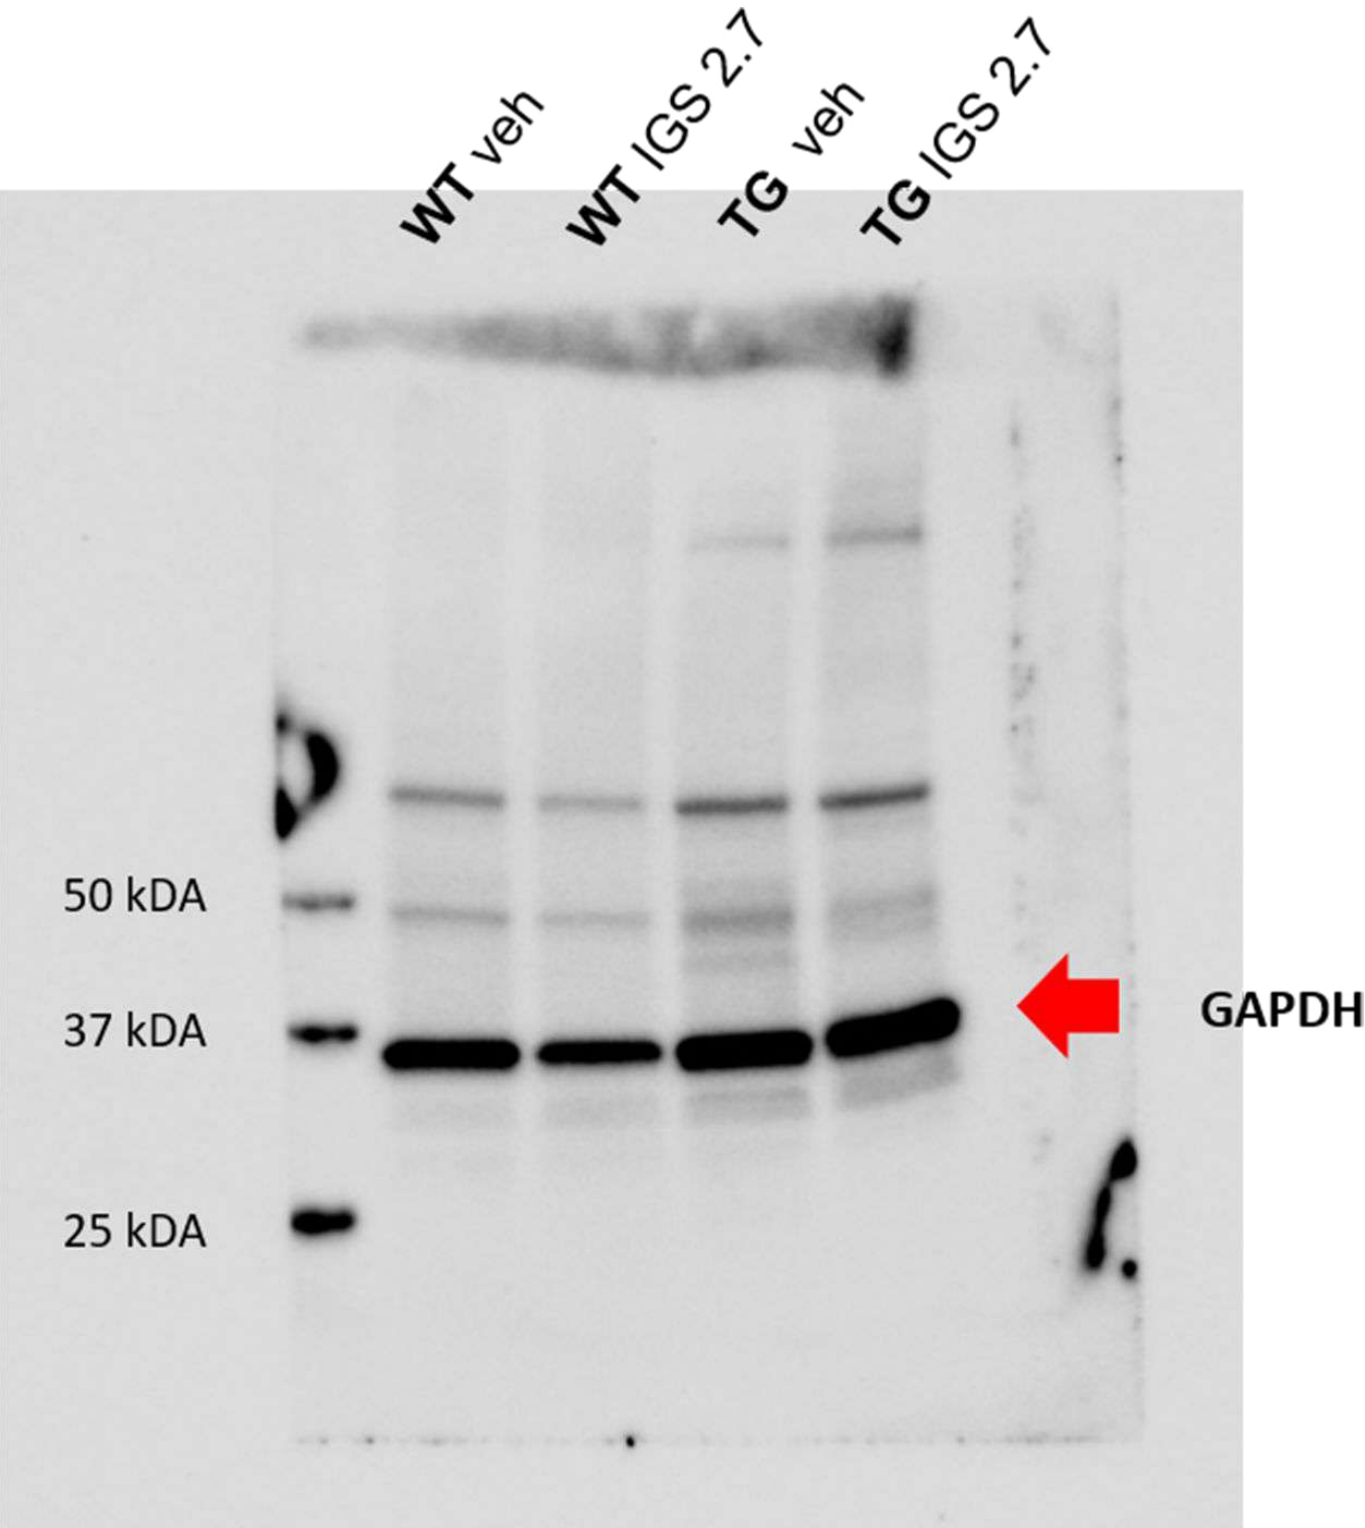

Supplemental figure 3

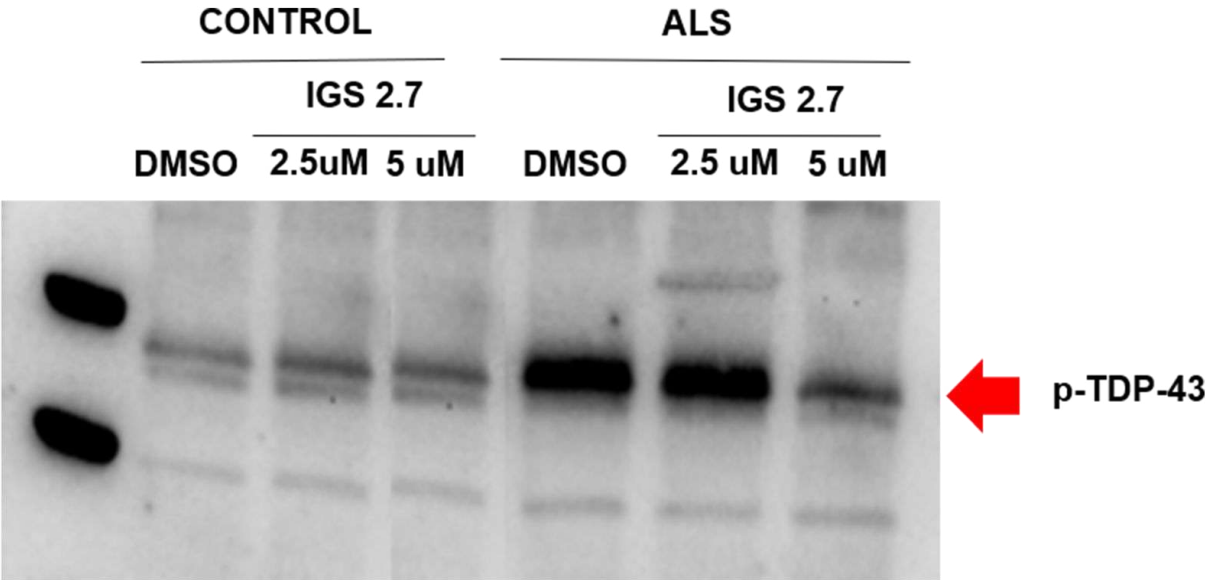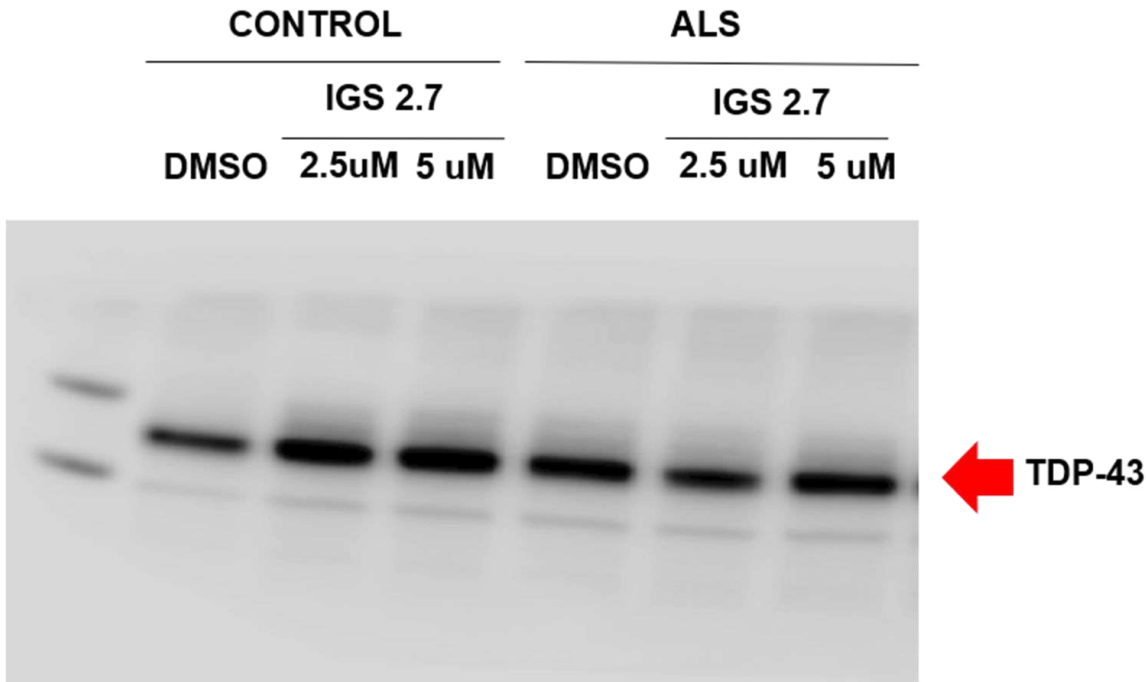

Supplement: 41598_2020_61265_MOESM1_ESM.pdf [file 41598_2020_61265_MOESM1_ESM.pdf]
